# Supplementary material for: Gene Replacement in Mycobacterium chelonae: Application to the Construction of Porin Knock-Out Mutants
Source: PubMed Central journal article supplement (PMC3989263; doi:10.1371/journal.pone.0094951), 2014-04-16
Supplement: pone.0094951.s001.pdf [file pone.0094951.s001.pdf]

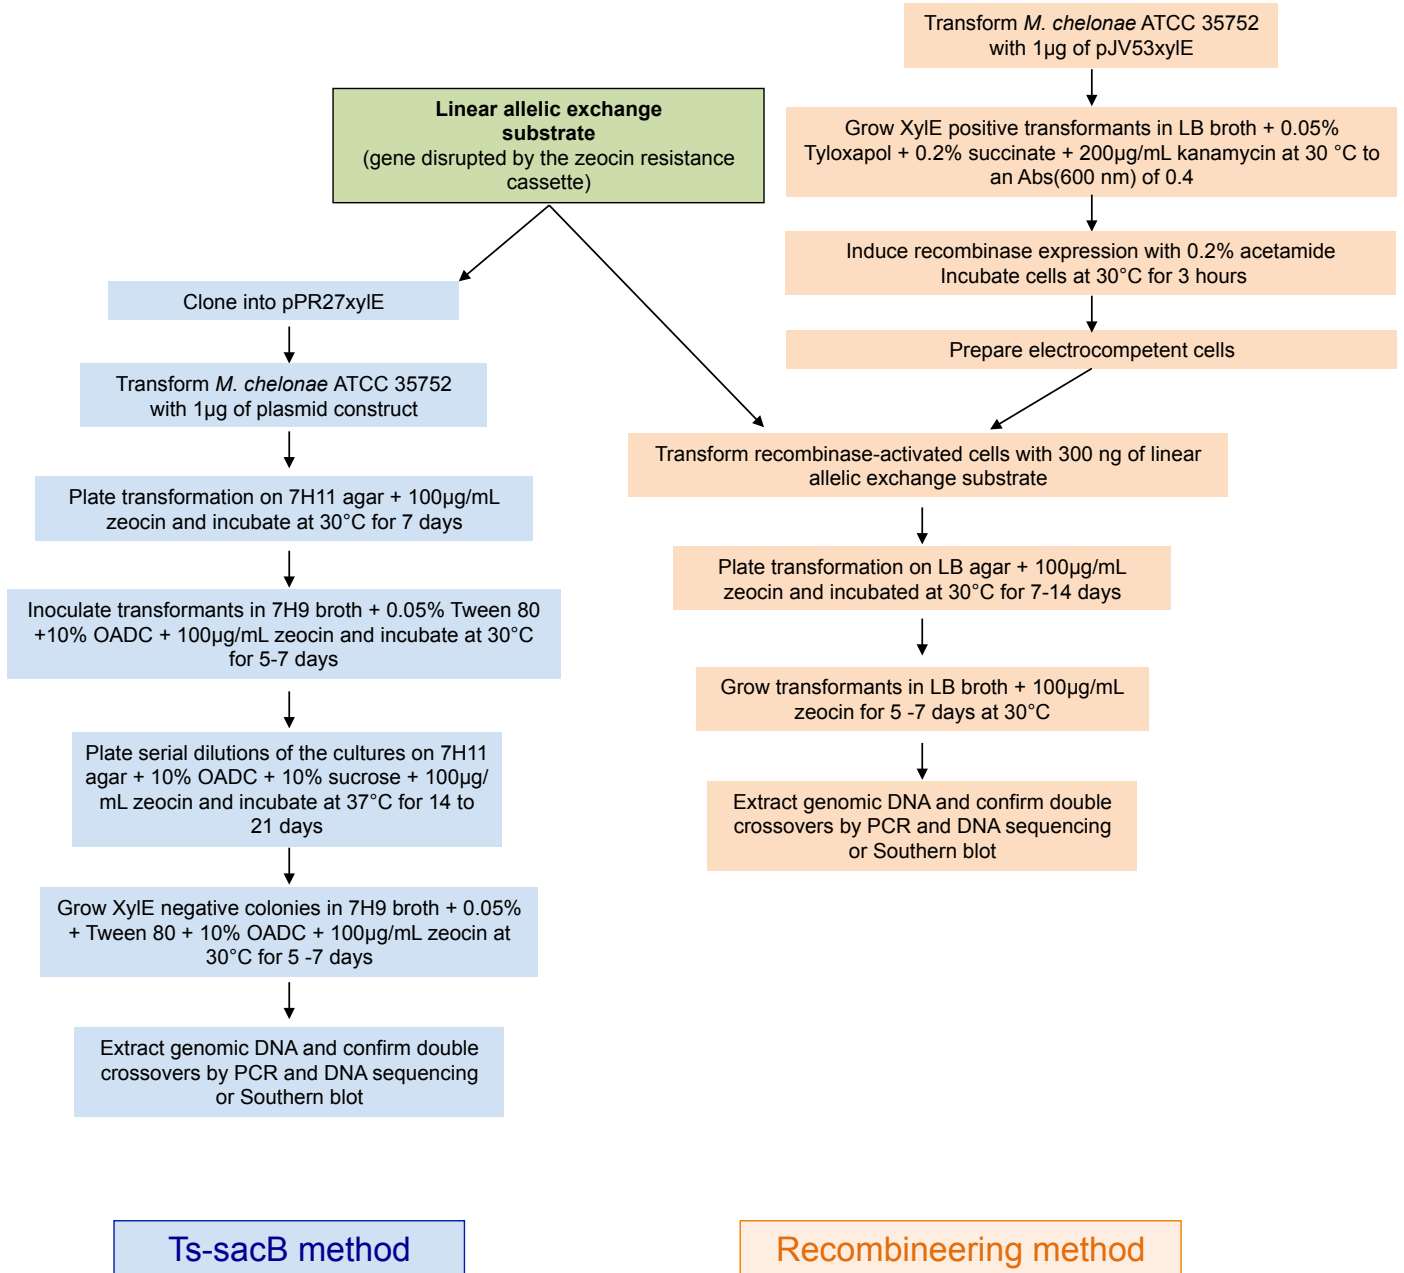

Figure S1
