# Supplementary material for: Gene Replacement in Mycobacterium chelonae: Application to the Construction of Porin Knock-Out Mutants
Source: PubMed Central journal article supplement (PMC3989263; doi:10.1371/journal.pone.0094951), 2014-04-16

**Fig. S2: Sequence alignment of the three porins from *M. chelonae* ATCC 35752.**

The arrow denotes the position of the cleavage site of the signal peptides as predicted by SignalP 3.0.

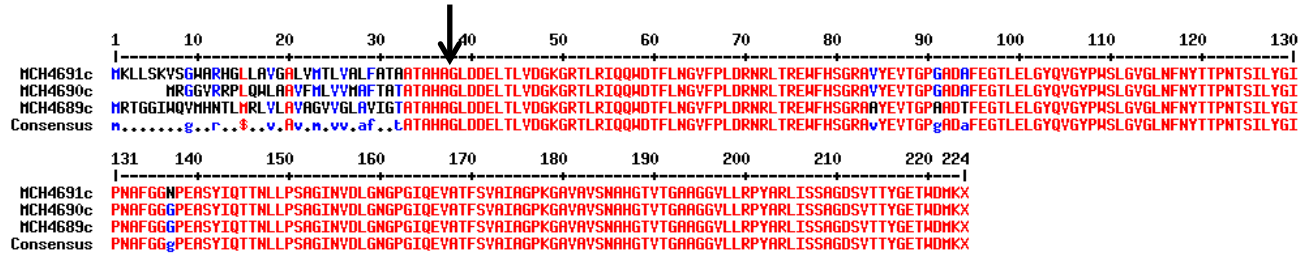

Supplement: pone.0094951.s002.pdf [file pone.0094951.s002.pdf]
